# Supplementary material for: Transcription Factor OsDOF18 Controls Ammonium Uptake by Inducing Ammonium Transporters in Rice Roots
Source: PubMed Central journal article supplement — Mol Cells. 2017 Mar 13;40(3):178–85. doi: 10.14348/molcells.2017.2261 (PMC5386955; doi:10.14348/molcells.2017.2261), 2017-03-13
Supplement: molce-40-3-178-supple.pdf [file molce-40-3-178-supple.pdf]

**Supplementary Table S1**

| Primer name | Sequence (5'-3')         |
|-------------|--------------------------|
| OsUBQ5-F    | TGAAGACCCTGACTGGGAAG     |
| OsUBQ5-R    | CACGGTTCAACAACATCCAG     |
| F1          | GTCGTCGTCTTCCTCGTCATC    |
| F2          | AAGACGACGACTTTCACAAC     |
| R1          | CATGGGAGGTTGAGGAACAC     |
| T-DNA       | CTAGAGTCGAGAATTCAGTACA   |
| Ds-1        | ACGGTAGAGGTATTTTACCGA    |
| OsAMT1;1-F  | ACCAATCCAGAACGAACGAC     |
| OsAMT1;1-R  | AGCCCAGCAAAAGTGAAAGA     |
| OsAMT1;2-F  | CTTCATCGGGAAGCAGTTCT     |
| OsAMT1;2-R  | TGAGGAAGGCGGAGTAGATG     |
| OsAMT1;3-F  | GAGATGGGAGGCCATGTCTA     |
| OsAMT1;3-R  | GTCAAATCCCCTGTTCCAAA     |
| OsAMT2;1-F  | GCGTTCGTGATCGCGTGGA      |
| OsAMT2;1-R  | TAGAGCTGGATGGTGACGC      |
| OsAMT2;2-F  | GCTCTTCGTGTCGTGTGGA      |
| OsAMT2;2-R  | TACAGCTGAATCGTGCTCCTC    |
| OsAMT2;3-F  | TCACCATTCAGTTGTAGAAGACGG |
| OsAMT2;3-R  | CTACACCAGCATTACATCACCGAA |
| OsAMT3;1-F  | GTCACGCAGAACGTCTGATGA    |
| OsAMT3;1-R  | GTATACAACCCCAAAAAGGAAAGG |
| OsAMT3;2-F  | CTCACCTTCTCCTACACCGTC    |
| OsAMT3;2-R  | ACCCCATCCATAGTAACCCTG    |

|              |                          |
|--------------|--------------------------|
| OsAMT3;3-F   | CGAGCATCACCATCATCATC     |
| OsAMT3;3-R   | ATGACACCCCACTGGAAGAG     |
| OsAMT3;1-R   | CTGGCCTCAAGAAGATGGACA    |
| OsAMT3;2-F   | AGCTGCTTACGTACTIONGATCG  |
| OsGOGAT1-F   | GAAACAGGCAAACCTTTTCAAGAC |
| OsGOGAT1-R   | GCATTTACCATGCAAATCA      |
| OsGOGAT2-F   | GAAGGATGATGAAGGTGAAACC   |
| OsGOGAT2-R   | ATGGCCCTACTATCTTCGCAT    |
| OsPEPC4-F    | CCAACACTACGTCGAGACACAG   |
| OsPEPC4-R    | CTCAATCCACTCCCACCAAT     |
| OsDOF18-RT-F | GTCGTCGTCTTCCTCGTCATC    |
| OsDOF18-RT-R | CAGACTCTTGGTTATGGACG     |
| OsNADP-MDH-F | CGGAGTCGTCGTCTCATTG      |
| OsNADP-MDH-R | TCTCAATGGCGGACTTGATG     |
| OsNRT2;1-F   | CTTGTTGCAAACGGTGATGA     |
| OsNRT2;1-R   | GCCTCTCCCTTATTATACCTCCG  |
